RESEARCH ARTICLE

# Social isolation is linked to classical risk factors of Alzheimer's disease-related dementias

Kimia Shafighi<sup>1\*</sup>, Sylvia Villeneuve<sup>2,3,4</sup>, Pedro Rosa Neto<sup>4,5,6,7</sup>, AmanPreet Badhwar<sup>8,9</sup>, Judes Poirier<sup>10</sup>, Vaibhav Sharma<sup>1</sup>, Yasser Iturria Medina<sup>2,11,12</sup>, Patricia P. Silveira<sup>3,12</sup>, Laurette Dube<sup>13</sup>, David Glahn<sup>14,15</sup>, Danilo Bzdok<sup>1,2,16,17</sup>

**1** Department of Biomedical Engineering, Faculty of Medicine, McGill University, Montreal, Canada, **2** McConnell Brain Imaging Centre (BIC), MNI, Faculty of Medicine, McGill University, Montreal, Canada, **3** Department of Psychiatry, McGill University, Montreal, Quebec, Canada, **4** Douglas Mental Health University Institute, Studies on Prevention of Alzheimer's Disease (StoP-AD) Centre, Montreal, Quebec, Canada, **5** Translational Neuroimaging Laboratory, McGill University Research Centre for Studies in Aging, Alzheimer's Disease Research Unit, Montreal, Canada, **6** Le Centre Intégré Universitaire de Santé et de Services Sociaux (CIUSSS) de l'Ouest-de-l'Île-de-Montréal, Montréal, Canada, **7** Department of Neurology and Neurosurgery, Psychiatry and Pharmacology and Therapeutics, McGill University, Montreal, Canada, **8** Département de Pharmacologie et Physiologie & Institut de Génie Biomédical, Faculté de Médecine, Université de Montréal, Montréal, Canada, **9** Centre de Recherche de l'Institut Universitaire de Gériatrie de Montréal (CRIUGM), Montréal, Canada, **10** Centre for Studies in the Prevention of Alzheimer's Disease, Douglas Mental Health Institute, McGill University, Montreal, Canada, **11** Neurology and Neurosurgery Department, Montreal Neurological Institute (MNI), Faculty of Medicine, McGill University, Montreal, Canada, **12** Ludmer Centre for Neuroinformatics and Mental Health, McGill University, Montreal, Canada, **13** Desautels Faculty of Management, McGill Center for the Convergence of Health and Economics, McGill University, Montreal, QC, Canada, **14** Tommy Fuss Center for Neuropsychiatric Disease Research, Department of Psychiatry, Boston Children's Hospital, Boston, MA, United States of America, **15** Department of Psychiatry, Harvard Medical School, Boston, MA, United States of America, **16** School of Computer Science, McGill University, Montreal, Canada, **17** Mila—Quebec Artificial Intelligence Institute, Montreal, Canada

\* [kimia.shafighi@mail.mcgill.ca](mailto:kimia.shafighi@mail.mcgill.ca)

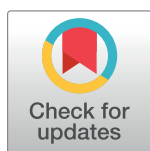

## OPEN ACCESS

**Citation:** Shafighi K, Villeneuve S, Rosa Neto P, Badhwar A, Poirier J, Sharma V, et al. (2023) Social isolation is linked to classical risk factors of Alzheimer's disease-related dementias. PLoS ONE 18(2): e0280471. <https://doi.org/10.1371/journal.pone.0280471>

**Editor:** Alessandra Coin, Clinica Geriatrica, ITALY

**Received:** March 24, 2022

**Accepted:** December 31, 2022

**Published:** February 1, 2023

**Copyright:** © 2023 Shafighi et al. This is an open access article distributed under the terms of the [Creative Commons Attribution License](https://creativecommons.org/licenses/by/4.0/), which permits unrestricted use, distribution, and reproduction in any medium, provided the original author and source are credited.

**Data Availability Statement:** Data cannot be shared publicly because the UK Biobank and the Canadian Longitudinal Study on Aging do not allow to re-share the whole or parts of their data. UK Biobank data are available through a procedure described at <http://www.ukbiobank.ac.uk/using-the-resource/>. All CLSA data are accessible to researchers through data access requests at <https://clsa-elcv.ca/data-access>.

**Funding:** The author(s) received no specific funding for this work.

## Abstract

Alzheimer's disease and related dementias is a major public health burden—compounding over upcoming years due to longevity. Recently, clinical evidence hinted at the experience of social isolation in expediting dementia onset. In 502,506 UK Biobank participants and 30,097 participants from the Canadian Longitudinal Study of Aging, we revisited traditional risk factors for developing dementia in the context of loneliness and lacking social support. Across these measures of subjective and objective social deprivation, we have identified strong links between individuals' social capital and various indicators of Alzheimer's disease and related dementias risk, which replicated across both population cohorts. The quality and quantity of daily social encounters had deep connections with key aetiopathological factors, which represent 1) personal habits and lifestyle factors, 2) physical health, 3) mental health, and 4) societal and external factors. Our population-scale assessment suggest that social lifestyle determinants are linked to most neurodegeneration risk factors, highlighting them as promising targets for preventive clinical action.

**Competing interests:** The authors have declared that no competing interests exist.

## Introduction

Alzheimer's disease and related dementias (ADRD) is a growing public health crisis. With no known cure, this devastating condition generates ~1 trillion global costs every year and places a considerable burden on patients, caregivers, and society [1]. The number of ADRD cases is estimated to triple by 2050 [2]. In a parallel development, there is now rapidly growing evidence that social isolation is associated with an escalated risk of ADRD [3–8]. In fact, the World Health Organization (WHO) has identified ADRD and social isolation, separately, as two global public health priorities [9, 10]. Both challenges may now be aggravating due to social deprivation as a consequence of the COVID-19 pandemic: many cities, states, and nations have imposed stringent social distancing measures—leading to probably the largest mass social isolation in recorded history.

Substantial progress has been made in delineating aetiopathological antecedents of this major neurodegenerative disease. While we have identified some biomarkers and short-term treatment of symptoms, our ability to attenuate the trajectory of neurodegenerative progression remains limited. As a source of hope, a recent consensus article [11] reported that potentially modifiable factors in ADRD amount to as much as 40% of the overall disease risk. Widely agreed upon risk factors include childhood education, exercise, socioeconomic status, smoking, alcohol consumption, hearing and vision loss, depression, diabetes, hypertension, sleep apnea, air pollution and obesity [11]. However, we still have a clouded understanding of how these risk factors are linked to social lifestyle. The relevance of subjective and objective social isolation for ADRD risk in relation to other commonly studied risk factors is only now attracting the attention of researchers, stakeholders, and policy makers. The premise of our study is that a wider characterization of these social behaviors in late life will enable a more complete conceptualization of ADRD risk, potentially paving the way for novel treatment avenues. Such new insight is imperative given that social behaviors are modifiable in principle through societal measures [12] in contrast to genetically determined risk. Social factors like loneliness, as a measure of *subjective* social isolation, and regular social support, as a measure of *objective* social isolation, are rarely considered in risk models or authoritative surveys of ADRD aetiopathology. This knowledge gap is particularly blatant when one considers social deprivation in the elderly.

There is substantial evidence that acceleration in cognitive decline [13–15] and increased dementia risk [16, 17] co-occurs with loneliness in individuals, which is also indicated by greater ADRD-related neuropathology [13, 18]. These pointers suggest that perceived social isolation plays an important and potentially independent role from objective social isolation in normative brain aging and its aberrations in neurodegenerative disease. Different facets of social isolation—loneliness, social network, social engagement, and social support—have been associated with poor health outcomes, including hypertension and immune system dysfunction [19, 20], cognitive decline [14, 21, 22], psychological distress (e.g. depression, anxiety), increased dementia risk [5] and shortened life expectancy [23]. Studying the role of social lifestyle in ADRD onset should therefore acknowledge determinants of both subjective loneliness feelings and objective social support frequency. Here, we have systematically revisited classical, widely acknowledged aetiopathological factors closely linked to ADRD by capitalizing on two unique cohorts: 502,506 participants from the UK Biobank [24] and 30,097 participants from the Canadian Longitudinal Study of Aging [25]. Empowered by the advent of the UK Biobank and CLSA cohorts [26, 27], we have tested the hypothesis that subjective loneliness and objective social support show robust associations with major ADRD risk factors. Narrowing this knowledge gap is particularly urgent when considering less well studied risk factors like late-life behaviors, including subjective and objective social isolation—which were recently exacerbated as a consequence of the COVID-19 pandemic.

## Methods

### Population cohort 1: UK Biobank

The UK Biobank is a prospective epidemiological cohort that offers extensive behavioral and demographic assessments in 502,506 participants, recruited from across Great Britain [28]. Our study involved the full population sample including 54.4% females, aged 40–69 years when recruited (mean age 56.5, standard deviation (SD) 8.1 years). The present analyses were conducted under UK Biobank application number 25163. All participants provided written, informed consent, and the study was approved by the Review Board of the McGill University Health Centre (REC number 11/NW/0382). All analyses were performed in accordance with the relevant guidelines and regulations. Further information on the consent procedure can be found elsewhere (<http://biobank.ctsu.ox.ac.uk/crystal/field.cgi?id=200>).

### Population cohort 2: Canadian longitudinal study of aging

CLSA was launched in 2011 as an independent prospective epidemiological cohort, and places a focus on aging trajectories and deep phenotyping [29]. This study follows a population of 30,097 individuals, including 50.9% females, aged 44–89 at enrollment (mean age 63.0, SD 10.3 years), recruited from 11 cities in 10 provinces across Canada. The acquisition of baseline data finished in 2015. All participants provided written, informed consent. Ethics approval was obtained by the Research Ethics Board at McGill University (REB file #20-05-068), and the study was conducted in compliance with their guidelines and regulations.

### Social isolation target phenotypes

Studying the role of social lifestyle in ADRD onset should acknowledge determinants of both subjective feelings of loneliness and objective social support frequency. Regarding the loneliness target, we used the yes/no answer from UK Biobank participants to the question ‘Do you often feel lonely?’ (data field 2020). In CLSA, our loneliness target measure was based on the question ‘How often did you feel lonely?’, with the positive answer denoting ‘all of the time (5–7 days)’. The validity of brief loneliness assessments has long been recognized, particularly for inclusion in large population-based studies [30]. Regarding the social support target, our UK Biobank analyses were based on the question ‘How often are you able to confide in someone close to you?’, as an objective measure of the frequency of social interactions (data field 2110). Our study modeled lack of social support as confiding less than ‘daily or almost daily’ (positive answer) against confiding in others more often (treated as negative answer). In CLSA, regarding lack of social support, participants were asked the question ‘Someone to confide in or talk to about yourself or your problems?’ and answers less than ‘all of the time’ or ‘most of the time’ were modeled as the positive case. In the UKBB and the CLSA, several items among the ADRD risk factors are defined such that the numerical encoding is different from what we used in our analysis. In all our models, we ensured that a higher value consistently meant more in a given phenotype and that a lower value meant less. For example, ‘Current tobacco consumption’ in the UKBB was re-encoded so that ‘occasionally’ was numerically greater than ‘no’ and smaller than ‘yes’. In the CLSA, ‘Current frequency of cigarettes smoked’ was reverse encoded so that ‘Daily’ and ‘Not at all’ corresponded to the highest and lowest values, respectively. Moreover, all categorical variables were treated as ordinal numeric variables. The original data-coding for all variables is available in S1 Table in [S1 File](#) and the entirety of our pre-processing for each item is available in our code (<http://github.com/banilo/ADRIK>).

## Multivariate decomposition approach

We used partial least squares (PLS) correlation to examine possible cross-associations between classical ADRD risk factors and social richness indicators (cf. S1 Table in [S1 File](#)). As used in our previous work, this technique is particularly useful when handling very large and strongly correlated datasets [31]. To analyze the relationship between the risk traits and the social factors, all input variables were systematically normalized by z-scoring across participants, and the observations (here, the participant responses) were stored in matrices, with  $X$  corresponding to the risk traits and  $Y$  representing the social indicators. The two sets of linear combinations of the original variables are obtained as follows:

$$X \in \mathbb{R}^{n \times p}$$

$$Y \in \mathbb{R}^{n \times q}$$

$$L_X = XV \quad L_Y = YU$$

$$l_{X,l} = Xv_l \quad l_{Y,l} = Yu_l$$

$$\text{corr}(l_{X,l}, l_{Y,l}) \propto l_{X,l}^T l_{Y,l} = \max$$

where  $n$  denotes the number of participants,  $p$  is the number of risk traits,  $q$  is the number of social factors (7 in the UKBB and 6 in the CLSA),  $V$  and  $U$  denote the respective contributions of  $X$  and  $Y$ ,  $L_X$  and  $L_Y$  denote the respective latent 'modes' of joint variation between patterns in  $X$  and patterns in  $Y$ ,  $l_{X,l}$  is the  $l^{\text{th}}$  column of  $L_X$ , and  $l_{Y,l}$  is the  $l^{\text{th}}$  column of  $L_Y$ . The goal of our PLS correlation application was to find pairs of latent vectors  $l_{X,l}$  and  $l_{Y,l}$  with maximal correlation in the derived latent embedding and quantify the strength of the relationship between the two variable sets in the derived embedding space (the risk traits and the social indicators). Since PLS correlation was purely used as an exploratory analysis, uncertainty in effect sizes were not measured.

## Bayesian regression approach

Next, to ascertain robust associations between social richness and ADRD aetiopathology in the wider society, Bayesian hierarchical regression was a natural choice of method [32], following our previous work at the population level [31, 33, 34]. In particular, classical tests for statistical significance would have only provided dichotomic statements in the form of p-values against the null hypothesis of no effect in the data [35, 36]. Instead, we aimed to directly quantify the probabilistic association of traditional ADRD risk to social isolation, while providing coherent estimates of associated uncertainty.

To this end, our analyses aimed at probabilistic answers to the question 'How certain are we that loneliness/lack of social support is linked to an ADRD risk phenotype?' Our analyses did not ask 'Is there a strict categorical answer as to whether or not a risk phenotype is linked to loneliness or lack of social support?' In this way, we aimed to directly quantify the population uncertainty intervals of risk effects in the context of social isolation. The full Bayesian model specification took the following form:

$$y \sim \text{Bernoulli}(p)$$

$$\text{logit}(p) = \alpha + x_1 * \text{risktrait} + x_2 * \text{agebeta} + x_3 * \text{sexbeta}$$

$$\alpha \sim \mathcal{N}(0, 1)$$

$$\text{risktrait} \sim \mathcal{N}(\mu_{\text{risk}}, \sigma_{\text{risk}})$$

$$\mu_{\text{risk}} \sim \mathcal{N}(0, 1)$$

$$\sigma_{\text{risk}} \sim \text{HalfNormal}(1)$$

$$\text{agebeta} \sim \mathcal{N}(0, 1)$$

$$\text{sexbeta} \sim \mathcal{N}(0, 1),$$

,where  $x_1$  denotes an ADRD risk phenotype of interest (e.g., number of cigarettes smoked per day) and  $y$  denotes one of the target measures of social isolation (i.e., loneliness or lack of social support, cf. above). Details on the full list of examined risk traits (51 from the UKBB, 43 from the CLSA) can be found in S1 Table in [S1 File](#). The multilevel formulation of the risk trait parameter serves flexible adaptation to different data settings. Variation that could be explained by participant age or sex was accounted for as potential confounds by  $x_2$  and  $x_3$ , respectively. In the UK Biobank or CLSA cohort, for a given risk phenotype of ADRD, we have estimated separate Bayesian models for loneliness and lack of social support. Prior to running the Bayesian models, we systematically z-scored all risk factor variables in order to make all input variables comparable.

Approximate posterior integration was achieved by means of Markov Chain Monte Carlo (MCMC), which sampled in a random walk towards the joint posterior distribution of all quantities at play [32]. In 1,000 draws, the approximate parameter distributions were improved at each step in the sense of converging to the target distribution. At each step of the MCMC chain, the entire set of parameter values were estimated to be jointly credible given the data. In the data exploration phase, we have inspected model convergence by overlap between the geometry of posterior parameter distributions from four independent MCMC chains. We obtained further evidence for proper convergence to a stable model solution based on the effect sample size and  $\hat{R}$  quality criteria. In the model exploitation phase, the final solution was computed by a single MCMC chain.

### Scientific computing implementation

Probabilistic hierarchical modeling and MCMC sampling [37] were implemented as symbolic computation graphs in the *PyMC3* framework (<https://github.com/pymc-devs/pymc3>). Posterior parameter distribution plots were generated by *Seaborn* (<https://seaborn.pydata.org/>). Missing data were imputed using a nonparametric method for the UK Biobank, and a Bayesian method for the CLSA. We used two different imputation methods in the CLSA and UKBB cohorts given the diverging properties of these population cohorts. The hot-deck imputation method that we have used for the UKBB is a common and computationally feasible method for imputation and involves using observed values in the sample to substitute missing values [38]. However, the hot-deck method may produce less precise model estimates for the mean and extreme quantiles than the Bayesian method [38]. The model-based Bayesian imputation is a more principled approach to handle missing data, since it entails specifying a probability model for the target variable, the covariates, and the missing data for estimation in a single modeling step [39]. Given that our study involved the full population sample from both

datasets, we could only do the more rigorous Bayesian imputation in the smaller CLSA cohort because it was not computationally expedient for the larger UKBB cohort. All analysis scripts that reproduce the results of the present study are readily accessible and open for reuse by the reader (<http://github.com/banilo/ADRIK>).

## Results

We set out to systematically explore possible links between major ADRD risk factors and rarely considered determinants of social isolation. Using a fully probabilistic approach, we carefully estimated the degree to which subjective and objective social isolation show population associations with established ADRD risk factors in the wider society. All our analyses reported in the following have been accounted for variation that can be explained by differences in participant age and sex. In the following, we present a series analysis of ADRD risk factors in four categories: 1) personal habits & lifestyle factors, 2) physical health factors, 3) mental health factors, and 4) societal & external factors, in similar measurements from the UKBB and the CLSA cohorts.

### Several rich cross-associations identified between social lifestyle and ADRD risk factors

We first performed a partial least squares analysis resulting in pairs of canonical vectors. We assessed whether the social indicators, including our target variables loneliness and lack of social support, were associated with the classical risk traits of ADRD. The multivariate pattern-learning approach revealed the constellations of features that carry consistent associations within both high-dimensional variable sets (i.e., the risk traits and the social indicators). The total variance explained of the original data matrices, shown separately for risk traits and social measures in Fig 1, is mapped for 7 PLS modes in the UKBB and 6 PLS modes in the CLSA. The canonical correlation for each mode quantified the linear correspondence between the two variable sets based on Pearson's correlation between their canonical variates [40]. In other words, the PLS analysis described the relationship between the first set of variables (the social indicators) and the second set of variables (the classical risk traits of ADRD). In both cohorts, a majority of the risk factors were linked to social lifestyle factors in at least one of the uncovered modes of joint variation.

In the UKBB cohort, the first mode, by construction, explained a larger fraction of variation than any other mode, with a canonical correlation  $\rho$  of 0.471 between the sets of variables. For the first canonical mode, interindividual differences in social richness dominated by loneliness (0.682) and lack of social support (0.437) were strongly paired with the personality traits among the ADRD risk factors, and the neuroticism score (0.408) in particular. The neuroticism score in the UKBB is defined as a composite score of 12 neurotic behavioural domains, which includes the loneliness item. The score ranges from zero to twelve, with a higher score indicating a higher degree of neurotic behaviour. Across the 7 modes, social determinants were related to lifestyle factors (e.g., exercise), mental health factors (e.g., personality), and societal factors (e.g., income). In the CLSA cohort, the variance in the first mode ( $\rho = 0.500$ ) was best explained by interindividual differences in loneliness (0.652) and lack of social support (0.512) among the social factors, and by watching TV (0.321) and getting a positive screen for depression (0.364) for the risk traits. The PLS analysis on the UKBB and the CLSA indicated that the examined social determinants reflected the risk factors of ADRD from each of the three pillars (lifestyle, mental health, and societal), in at least one of the modes of joint variation, while the associations with the physical health measures were consistently weak. Across both cohorts, the social domain of the first mode—which by construction, explains a larger



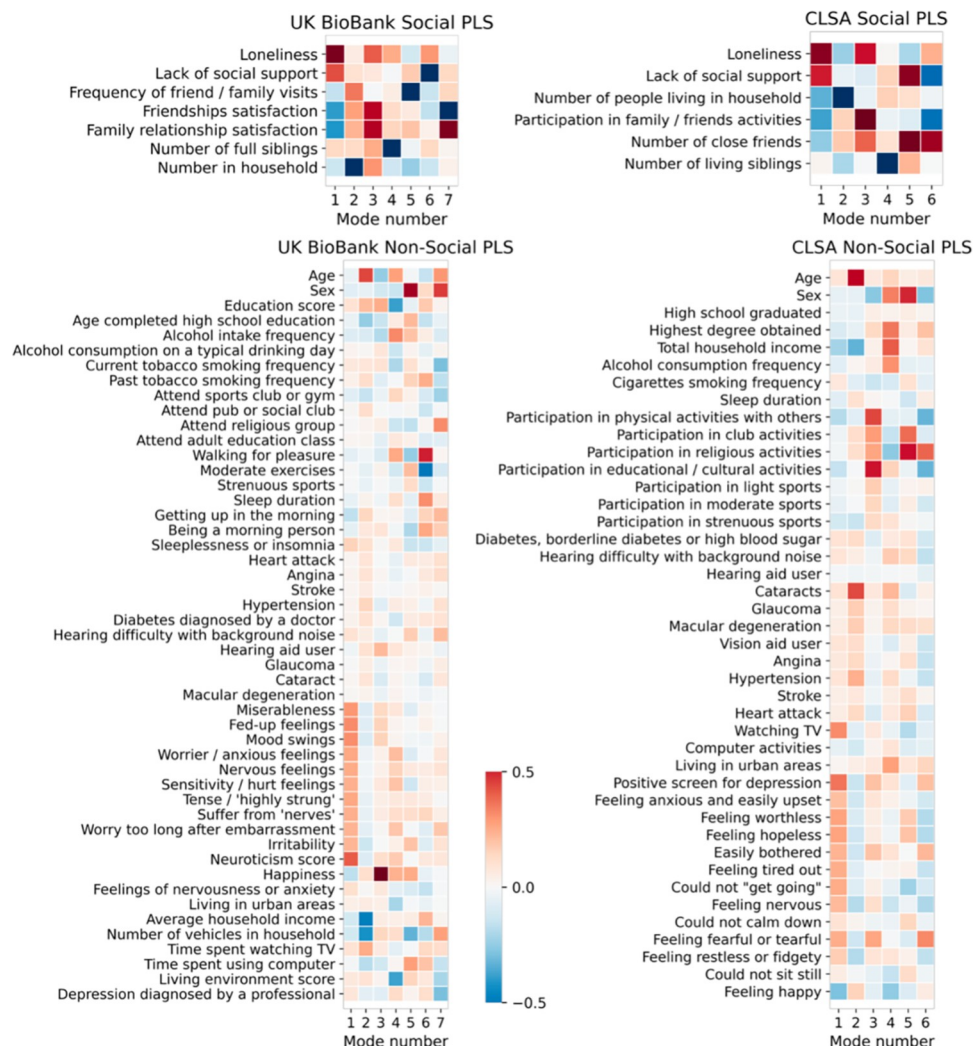

**Fig 1. Widespread cross-associations exist between social deprivation indicators and traditional risk factors for Alzheimer's dementias.** To gain a synoptic overview, we initially explored multivariable relationships between sets of social richness measures (top row) and sets of usually studied aetiopathological risk factors (lower row). In 502,506 UK Biobank participants (left column), the leading explanatory patterns ('modes') show that perceived and objective social isolation are associated with higher neuroticism scores and similar personality styles. In 30,097 CLSA participants (right column), the dominant pattern links loneliness and lacking social support to TV consumption and depression-related emotional traits. This doubly multivariate decomposition of two variable sets was obtained from partial least squares analysis (PLS; cf. Methods). Note that this cursory analysis does not attempt to single out special variables (in contrast to the analyses from Figs 2–5). Overall, this perspective makes apparent that the majority of examined risk factors may be related to some aspect of social lifestyle.

<https://doi.org/10.1371/journal.pone.0280471.g001>

fraction of variation than any other mode—was dominated by loneliness and lack of social support, which happen to be the two representative measures of subjective and objective social isolation throughout the present paper.

## Bayesian regression between two determinants of social isolation and ADRD risk factors

Using a fully probabilistic approach, we next carefully estimated the degree to which subjective and objective social isolation show population associations with established ADRD risk factors

in the wider society. The Bayesian framework provided a unique approach to explore relevant ADRD risk traits. The estimated posterior parameter distributions, resulting from the Bayesian analyses, implied that the social isolation measures—loneliness or lack of social support—had strong associations with target ADRD risk. The elected model was the same for all considered target risk factors. The full posterior parameter distributions—not sampling distributions—from our Bayesian modeling solutions for each variable of interest can be found in the Supporting Information (cf. S1-S4 Figs in [S1 File](#)). For brevity, we here report the mean and the 90% highest posterior density interval (HPDI) of the model parameters, after seeing the data, which contains the 90% most credible parameter solutions in [Table 1](#), summarized in the bar plots of [Figs 2–5](#). The height of each bar plot refers to the mean value and the black error bars indicate the 90% HDPI of the effects of loneliness and lack of social support.

### Personal habits & lifestyle factors

Taken together, our results showed statistically defensible links between both social determinants and the classical lifestyle risk factors of ADRD, which were replicated in the 502,506 UKBB and the 30,097 CLSA participants ([Fig 2](#)). Individuals who smoked more, excessively drank alcohol, experienced sleep disturbances, and failed to frequently participate in light to vigorous physical activities had a greater odds of being lonely and lacking social support. In the UKBB, a higher number of cigarettes currently smoked was associated with a 19.7% increase in the odds of feeling lonely. In addition, more frequent tobacco smoking corresponded to 10.2% increase in the odds of weak social support. In the CLSA, increasing regular participation in physical exercise with other people resulted in 20.1% decrease in the odds of feeling lonely and 26.9% decrease in having poor social support. Watching TV showed strong effects on increased feelings of loneliness and poor social support, while using the computer was linked with less loneliness and better social support. We also found that participating in religious activities was associated with reduced subjective and objective social isolation.

### Physical health factors

We observed mutually confirmatory results between the CLSA and the UKBB among the physical health factors ([Fig 3](#)). Cardiovascular diseases were consistently associated with greater loneliness and lacking social support, with distinct stronger effects on loneliness in the UKBB. We discovered greater associations between the social determinants and vision impairments in the CLSA, and further found that CLSA participants that use specialized aids for persons who are blind or visually impaired had greater odds of feeling lonely and lacking social support. Diabetes and hearing impairment, both recognized risk factors of dementia, showed prominent links with subjective and objective social isolation across both cohorts. In the UKBB, difficulty to hear with background noise corresponded to a 29.0% increase in the odds of feeling lonely and a 9.86% increase in the odds of lacking social support. Still within the UKBB, individuals who used a hearing aid had reduced levels of loneliness and better social support. For the physical health factors in particular, the model uncertainty of our effects—indicated by wider posterior parameter distribution—was greater in the CLSA, attributable to the smaller set of data available in the CLSA relative to the UKBB.

### Mental health factors

Collectively, mental health factors revealed strong population associations with both subjective and objective social isolation ([Fig 4](#)). All the different measures of personality, corresponding to neurotic and depressive behaviours, showed the largest associations with both subjective and objective social determinants, across the UKBB and the CLSA cohorts. In particular, the



Table 1. Mean associations between subjective and objective social isolation and ADRD risk factors in the UKBB and the CLSA.

| <b>Personal Habits &amp; Lifestyle Factors</b> |                                                   |                   |         |          |                               |         |          |
|------------------------------------------------|---------------------------------------------------|-------------------|---------|----------|-------------------------------|---------|----------|
| UKBB                                           |                                                   | <i>Loneliness</i> |         |          | <i>Lack of Social Support</i> |         |          |
|                                                |                                                   | Mean              | 5% HDPI | 95% HDPI | Mean                          | 5% HDPI | 95% HDPI |
| <i>Smoking</i>                                 | Current tobacco smoking                           | 0.180             | 0.175   | 0.185    | 0.097                         | 0.092   | 0.101    |
|                                                | Past tobacco smoking                              | 0.085             | 0.079   | 0.092    | 0.003                         | -0.001  | 0.008    |
| <i>Alcohol</i>                                 | Alcohol intake frequency                          | -0.208            | -0.213  | -0.202   | -0.110                        | -0.114  | -0.104   |
|                                                | Amount of alcohol drunk on a typical drinking day | 0.097             | 0.090   | 0.106    | 0.041                         | 0.035   | 0.048    |
| <i>Sleep Disturbance</i>                       | Daily sleep duration                              | -0.145            | -0.152  | -0.139   | -0.109                        | -0.114  | -0.104   |
|                                                | Difficulty getting up in the morning              | -0.321            | -0.328  | -0.315   | -0.145                        | -0.150  | -0.140   |
|                                                | Morning person                                    | -0.097            | -0.103  | -0.091   | -0.065                        | -0.070  | -0.060   |
|                                                | Insomnia or sleeplessness                         | 0.386             | 0.379   | 0.392    | 0.125                         | 0.121   | 0.130    |
| <i>Physical Exercise</i>                       | Light—walking for pleasure                        | -0.158            | -0.164  | -0.152   | -0.117                        | -0.122  | -0.112   |
|                                                | Moderate—swimming, cycling, keep fit, bowling     | -0.001            | -0.007  | 0.004    | 0.048                         | 0.043   | 0.052    |
|                                                | Strenuous—strenuous sports                        | -0.020            | -0.027  | -0.014   | 0.011                         | 0.006   | 0.015    |
|                                                | Attending sports club or gym                      | -0.149            | -0.156  | -0.143   | -0.043                        | -0.048  | -0.037   |
| <i>Digital Technology</i>                      | Time spent watching television                    | 0.253             | 0.247   | 0.259    | 0.073                         | 0.068   | 0.077    |
|                                                | Time spent using the computer                     | -0.014            | -0.020  | -0.007   | -0.007                        | -0.012  | -0.002   |
| <i>Religious Activities</i>                    | Attending a religious group                       | -0.009            | -0.015  | -0.003   | -0.010                        | -0.014  | -0.005   |
| CLSA                                           |                                                   | <i>Loneliness</i> |         |          | <i>Lack of Social Support</i> |         |          |
|                                                |                                                   | Mean              | 5% HDPI | 95% HDPI | Mean                          | 5% HDPI | 95% HDPI |
| <i>Smoking</i>                                 | Current frequency of cigarettes smoked            | 0.202             | 0.179   | 0.225    | 0.256                         | 0.233   | 0.283    |
| <i>Alcohol</i>                                 | Alcohol drinking frequency in past 12 months      | -0.132            | -0.157  | -0.112   | -0.164                        | -0.191  | -0.139   |
| <i>Sleep Disturbance</i>                       | Number of sleep hours during past month           | -0.137            | -0.161  | -0.117   | -0.129                        | -0.153  | -0.104   |
| <i>Physical Exercise</i>                       | Light—bowling, shuffleboard, badminton, fishing   | -0.009            | -0.030  | 0.013    | -0.057                        | -0.083  | -0.029   |
|                                                | Moderate—hunting, skating, softball               | -0.043            | -0.067  | -0.022   | -0.065                        | -0.092  | -0.038   |
|                                                | Strenuous—jogging, swimming, cycling, skiing      | -0.109            | -0.134  | -0.088   | -0.155                        | -0.184  | -0.128   |
|                                                | Participation in physical activities with others  | -0.224            | -0.245  | -0.203   | -0.314                        | -0.340  | -0.291   |
| <i>Digital Technology</i>                      | Participation in watching television              | 0.027             | 0.006   | 0.051    | -0.006                        | -0.029  | 0.018    |
|                                                | Participation in computer activities              | -0.055            | -0.076  | -0.030   | -0.063                        | -0.088  | -0.037   |
| <i>Religious Activities</i>                    | Participation in religious activities             | -0.032            | -0.055  | -0.012   | -0.116                        | -0.143  | -0.091   |
| Physical Health Factors                        |                                                   |                   |         |          |                               |         |          |
| UKBB                                           |                                                   | <i>Loneliness</i> |         |          | <i>Lack of Social Support</i> |         |          |
|                                                |                                                   | Mean              | 5% HDPI | 95% HDPI | Mean                          | 5% HDPI | 95% HDPI |
| <i>Cardiovascular Conditions</i>               | Heart attack                                      | 0.070             | 0.065   | 0.076    | 0.017                         | 0.013   | 0.022    |
|                                                | Angina                                            | 0.081             | 0.076   | 0.086    | 0.018                         | 0.013   | 0.022    |
|                                                | High blood pressure                               | 0.070             | 0.064   | 0.076    | 0.019                         | 0.014   | 0.023    |
|                                                | Stroke                                            | 0.053             | 0.048   | 0.059    | 0.014                         | 0.009   | 0.019    |
| <i>Diabetes</i>                                | Diabetes diagnosed by a professional              | 0.119             | 0.114   | 0.125    | 0.040                         | 0.035   | 0.044    |
| <i>Hearing Impairment</i>                      | Difficulty hearing with background noise          | 0.255             | 0.249   | 0.261    | 0.094                         | 0.090   | 0.099    |
|                                                | Hearing aid user                                  | -0.030            | -0.037  | -0.022   | -0.045                        | -0.050  | -0.040   |
| <i>Vision Impairment</i>                       | Glaucoma                                          | 0.019             | 0.013   | 0.024    | 0.011                         | 0.005   | 0.015    |
|                                                | Cataracts                                         | 0.035             | 0.028   | 0.040    | 0.026                         | 0.021   | 0.031    |
|                                                | Macular degeneration                              | 0.013             | 0.007   | 0.018    | 0.008                         | 0.003   | 0.012    |
| CLSA                                           |                                                   | <i>Loneliness</i> |         |          | <i>Lack of Social Support</i> |         |          |
|                                                |                                                   | Mean              | 5% HDPI | 95% HDPI | Mean                          | 5% HDPI | 95% HDPI |

(Continued)

Table 1. (Continued)

| <b>Personal Habits &amp; Lifestyle Factors</b> |                                                                                |                   |         |          |                               |         |          |
|------------------------------------------------|--------------------------------------------------------------------------------|-------------------|---------|----------|-------------------------------|---------|----------|
| <i>Cardiovascular Conditions</i>               | Heart attack or myocardial infarction                                          | 0.026             | 0.004   | 0.047    | 0.034                         | 0.010   | 0.055    |
|                                                | Angina (or chest pain due to heart disease)                                    | 0.054             | 0.035   | 0.076    | 0.048                         | 0.026   | 0.071    |
|                                                | High blood pressure or hypertension                                            | 0.050             | 0.030   | 0.073    | 0.064                         | 0.037   | 0.088    |
|                                                | Stroke or CVA                                                                  | 0.054             | 0.032   | 0.073    | 0.047                         | 0.025   | 0.067    |
| <i>Diabetes</i>                                | Diabetes, borderline diabetes, or high blood sugar diagnosed by a professional | 0.088             | 0.068   | 0.110    | 0.092                         | 0.070   | 0.116    |
| <i>Hearing Impairment</i>                      | Difficulty hearing with background noise                                       | 0.136             | 0.116   | 0.159    | 0.116                         | 0.093   | 0.140    |
|                                                | Hearing aid user                                                               | 0.031             | -0.067  | 0.108    | -0.068                        | -0.146  | 0.022    |
| <i>Vision Impairment</i>                       | Glaucoma                                                                       | 0.054             | 0.034   | 0.075    | 0.046                         | 0.022   | 0.067    |
|                                                | Cataracts                                                                      | 0.044             | 0.021   | 0.073    | 0.050                         | 0.019   | 0.078    |
|                                                | Macular degeneration                                                           | 0.033             | 0.011   | 0.056    | 0.051                         | 0.030   | 0.073    |
|                                                | Vision aid user (besides glasses or contact lenses)                            | 0.097             | 0.075   | 0.115    | 0.115                         | 0.093   | 0.137    |
| <i>Mental Health Factors</i>                   |                                                                                |                   |         |          |                               |         |          |
| UKBB                                           |                                                                                | <i>Loneliness</i> |         |          | <i>Lack of Social Support</i> |         |          |
|                                                |                                                                                | Mean              | 5% HDPI | 95% HDPI | Mean                          | 5% HDPI | 95% HDPI |
| <i>Depression</i>                              | Diagnosed with depression by a professional                                    | 0.155             | 0.150   | 0.160    | 0.059                         | 0.054   | 0.064    |
| <i>Anxiety</i>                                 | Feeling nervous, anxious, 'on-edge'                                            | 0.290             | 0.282   | 0.297    | 0.112                         | 0.105   | 0.117    |
| <i>Happiness</i>                               | Feeling happy                                                                  | -0.509            | -0.517  | -0.501   | -0.346                        | -0.352  | -0.339   |
| <i>Personality Traits</i>                      | Neuroticism score                                                              | 1.306             | 1.298   | 1.314    | 0.337                         | 0.332   | 0.343    |
|                                                | Fed-up feelings                                                                | 0.980             | 0.973   | 0.987    | 0.305                         | 0.301   | 0.310    |
|                                                | Mood swings                                                                    | 0.804             | 0.798   | 0.811    | 0.242                         | 0.238   | 0.247    |
|                                                | Miserableness                                                                  | 0.779             | 0.772   | 0.786    | 0.241                         | 0.236   | 0.246    |
|                                                | Sensitivity / hurt feelings                                                    | 0.616             | 0.608   | 0.623    | 0.151                         | 0.146   | 0.156    |
|                                                | Worrier / anxious feelings                                                     | 0.521             | 0.514   | 0.528    | 0.122                         | 0.117   | 0.127    |
|                                                | Worry too long after                                                           | 0.487             | 0.480   | 0.493    | 0.167                         | 0.163   | 0.172    |
|                                                | embarrassment                                                                  |                   |         |          |                               |         |          |
|                                                | Suffer from 'nerves'                                                           | 0.497             | 0.492   | 0.503    | 0.158                         | 0.153   | 0.162    |
|                                                | Tense / 'highly strung'                                                        | 0.464             | 0.459   | 0.470    | 0.167                         | 0.162   | 0.172    |
|                                                | Nervous feelings                                                               | 0.432             | 0.427   | 0.438    | 0.143                         | 0.138   | 0.147    |
|                                                | Irritability                                                                   | 0.385             | 0.379   | 0.390    | 0.153                         | 0.148   | 0.157    |
| CLSA                                           |                                                                                | <i>Loneliness</i> |         |          | <i>Lack of Social Support</i> |         |          |
|                                                |                                                                                | Mean              | 5% HDPI | 95% HDPI | Mean                          | 5% HDPI | 95% HDPI |
| <i>Depression</i>                              | Clinical depression                                                            | 0.303             | 0.284   | 0.324    | 0.176                         | 0.154   | 0.199    |
| <i>Anxiety</i>                                 | Sees oneself as anxious and easily upset                                       | 0.358             | 0.337   | 0.378    | 0.227                         | 0.206   | 0.253    |
| <i>Happiness</i>                               | Frequency of feeling happy                                                     | -0.700            | -0.720  | -0.678   | -0.522                        | -0.545  | -0.500   |
| <i>Personality Traits</i>                      | Feeling fearful / tearful                                                      | 0.587             | 0.568   | 0.609    | 0.253                         | 0.230   | 0.276    |
|                                                | Could not 'get going'                                                          | 0.541             | 0.521   | 0.561    | 0.324                         | 0.302   | 0.345    |
|                                                | Feeling hopeless                                                               | 0.454             | 0.431   | 0.475    | 0.322                         | 0.300   | 0.345    |
|                                                | Easily bothered                                                                | 0.450             | 0.430   | 0.469    | 0.232                         | 0.205   | 0.253    |
|                                                | Feeling worthless                                                              | 0.436             | 0.414   | 0.458    | 0.296                         | 0.274   | 0.317    |
|                                                | Feeling nervous                                                                | 0.406             | 0.385   | 0.430    | 0.250                         | 0.227   | 0.275    |
|                                                | Feeling tired out                                                              | 0.402             | 0.381   | 0.424    | 0.288                         | 0.264   | 0.310    |
|                                                | Feeling restless / fidgety                                                     | 0.346             | 0.325   | 0.367    | 0.199                         | 0.176   | 0.224    |
|                                                | Could not calm down                                                            | 0.263             | 0.233   | 0.288    | 0.210                         | 0.179   | 0.240    |
|                                                | Could not sit still                                                            | 0.214             | 0.185   | 0.243    | 0.157                         | 0.123   | 0.194    |
| <i>Societal &amp; External Factors</i>         |                                                                                |                   |         |          |                               |         |          |

(Continued)

Table 1. (Continued)

| <b>Personal Habits &amp; Lifestyle Factors</b> |                                                                            |            |         |          |                        |         |          |
|------------------------------------------------|----------------------------------------------------------------------------|------------|---------|----------|------------------------|---------|----------|
| UKBB                                           |                                                                            | Loneliness |         |          | Lack of Social Support |         |          |
|                                                |                                                                            | Mean       | 5% HDPI | 95% HDPI | Mean                   | 5% HDPI | 95% HDPI |
| <i>Social Interaction</i>                      | Number of people in household                                              | -0.405     | -0.412  | -0.395   | -0.227                 | -0.233  | -0.221   |
|                                                | Frequency of visits from friends / family                                  | -0.164     | -0.171  | -0.158   | -0.186                 | -0.191  | -0.182   |
|                                                | Friendships satisfaction                                                   | -0.377     | -0.385  | -0.370   | -0.279                 | -0.285  | -0.273   |
|                                                | Family relationship satisfaction                                           | -0.387     | -0.395  | -0.379   | -0.349                 | -0.356  | -0.343   |
|                                                | Number of full siblings                                                    | 0.127      | 0.122   | 0.133    | 0.042                  | 0.038   | 0.047    |
| <i>Socioeconomic Status</i>                    | Average total household income                                             | -0.409     | -0.416  | -0.402   | -0.230                 | -0.235  | -0.225   |
|                                                | Number of vehicles                                                         | -0.371     | -0.378  | -0.365   | -0.218                 | -0.223  | -0.213   |
| <i>Education</i>                               | Education score                                                            | 0.222      | 0.216   | 0.227    | 0.075                  | 0.071   | 0.080    |
|                                                | Age completed full-time education                                          | 0.009      | 0.002   | 0.015    | -0.018                 | -0.023  | -0.013   |
|                                                | Attending adult education classes                                          | 0.027      | 0.021   | 0.032    | 0.028                  | 0.023   | 0.032    |
| <i>Living Environment</i>                      | Living in urban areas                                                      | 0.082      | 0.075   | 0.088    | 0.047                  | 0.042   | 0.051    |
|                                                | Living environment score                                                   | 0.150      | 0.143   | 0.156    | 0.111                  | 0.106   | 0.115    |
| CLSA                                           |                                                                            | Loneliness |         |          | Lack of Social Support |         |          |
|                                                |                                                                            | Mean       | 5% HDPI | 95% HDPI | Mean                   | 5% HDPI | 95% HDPI |
| <i>Social Interaction</i>                      | Number of people in household                                              | -0.445     | -0.470  | -0.415   | -0.259                 | -0.286  | -0.227   |
|                                                | Frequency of participation in friends / family activities out of household | -0.213     | -0.232  | -0.192   | -0.381                 | -0.403  | -0.353   |
|                                                | Number of close friends                                                    | -0.239     | -0.273  | -0.208   | -0.672                 | -0.728  | -0.620   |
|                                                | Number of living siblings                                                  | 0.023      | 0.001   | 0.045    | 0.038                  | 0.015   | 0.059    |
| <i>Socioeconomic Status</i>                    | Total household income from the past 12 months                             | -0.471     | -0.497  | -0.445   | -0.469                 | -0.498  | -0.443   |
| <i>Education</i>                               | High school graduated                                                      | -0.044     | -0.066  | -0.025   | -0.038                 | -0.062  | -0.015   |
|                                                | Higher degree obtained                                                     | -0.122     | -0.144  | -0.098   | -0.151                 | -0.176  | -0.123   |
|                                                | Participation in educational or cultural activities                        | -0.169     | -0.191  | -0.149   | -0.271                 | -0.295  | -0.246   |
| <i>Living Environment</i>                      | Living in urban areas                                                      | 0.064      | 0.040   | 0.088    | 0.041                  | 0.014   | 0.066    |

<https://doi.org/10.1371/journal.pone.0280471.t001>

neuroticism score in the UKBB showed the greatest effect for loneliness and lack of social support. The odds of feeling lonely and lacking social support were 3.7 and 1.4 times greater, respectively, as a function of the neuroticism score. Further, we observed in both cohorts that feelings of happiness had a strong notable link with reduced loneliness and poor social support. We also found relevant associations between an individual's social capital and determinants of mental distress such as depression and anxiety.

### Societal & external factors

Overall, our results revealed that the opportunities for social interactions and the quality of these social exchanges held strong associations with loneliness and lack of social support in both datasets (Fig 5). In both cohorts, we found that individuals who shared their home with many people, and frequently participated in family or friendship activities were less often lonely and had better social support. In the UKBB, individuals who expressed greater satisfaction with their family relationship and their friendships revealed that the quality of social exchange also held salient effects on loneliness and lacking social support. And in the CLSA, a one unit increase in the number of close friends corresponded to 21.3% decrease in the odds of feeling lonely, and 48.8% decrease in the odds of lacking social support. However, in both the UKBB and the CLSA cohorts, we observed that having a greater number of siblings showed

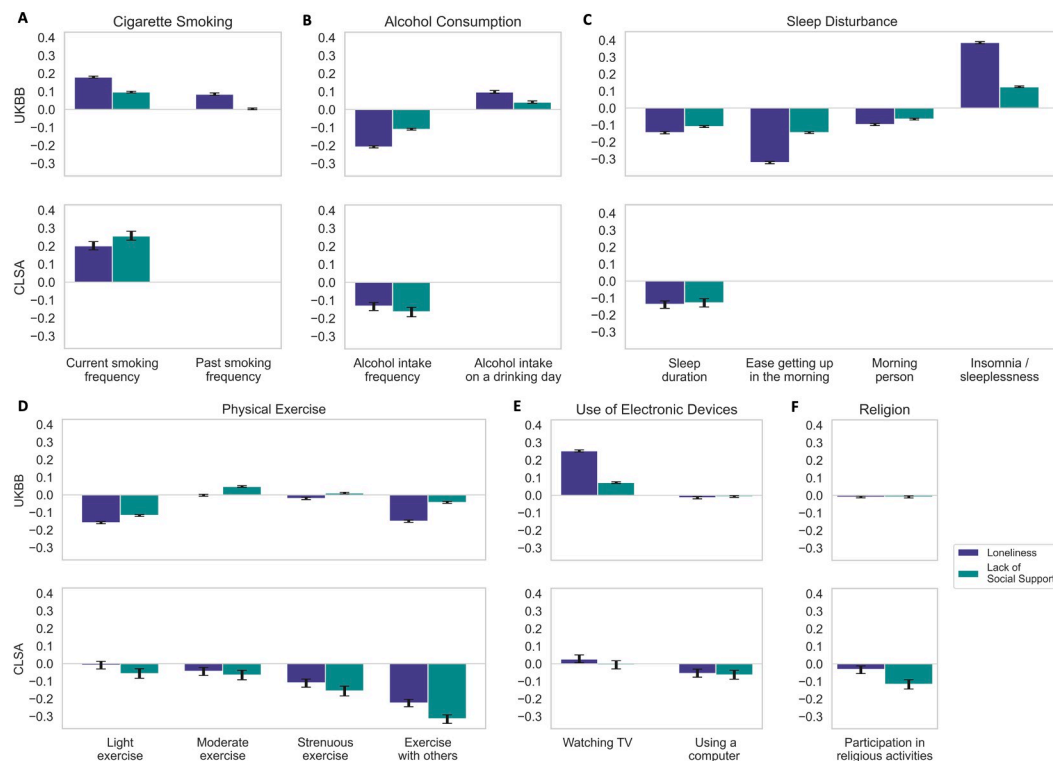

**Fig 2. Various ADRD-related lifestyle factors show strong association effects with loneliness and lack of social support across both cohorts.** Bayesian estimation of the posterior probability that a given risk factor relates to one of two measures of social deprivation: loneliness and lack of social support. All target risk factor variables were z-scored prior to running the Bayesian models. For simplicity, results are expressed as the mean and the 90% highest posterior density interval of the model coefficients (black error bars). In both UKBB and the CLSA, loneliness and lack of social support are robustly associated with a variety of lifestyle factors, including (A) current cigarette smoking, (B) alcohol consumption, (C) sleep duration, and (D) participation in physical activities with others. (E) Use of electronic devices and (F) participation in religious activities show smaller links to loneliness and weak social support. Both subjective and objective social isolation follow similar patterns in their associations with behavioural traits across the two cohorts. Sleeplessness has the largest association with social isolation in this category.

<https://doi.org/10.1371/journal.pone.0280471.g002>

notable effects on increased feelings of loneliness and lacking social support. Further, we found salient links between the two measures of social isolation and socioeconomic status, measured as a combination of income, occupation, and education. In the UKBB, receiving a higher average household income corresponded to a decrease in the odds of feeling lonely and lacking social support by 33.5% and 20.6%, respectively. Finally, in both the UKBB and CLSA, living in an urban environment, as opposed to a rural setting, was associated with higher levels of loneliness and poor social support.

## Discussion

The present study brings into sharp focus the multifaceted nature of inter-relationships between social isolation and major ADRD risk factors. Our collective findings suggest that both perceived and factual social capital—loneliness and lack of social support—are consistently associated with classical ADRD risk factors, after accommodating effects for age and sex differences. To the best of our knowledge, this is the first study that explicitly targeted possible links between social isolation and a comprehensive array of most studied risk factors of ADRD, which we have here demonstrated using data from two nationally representative population cohorts of older adults from two different countries.

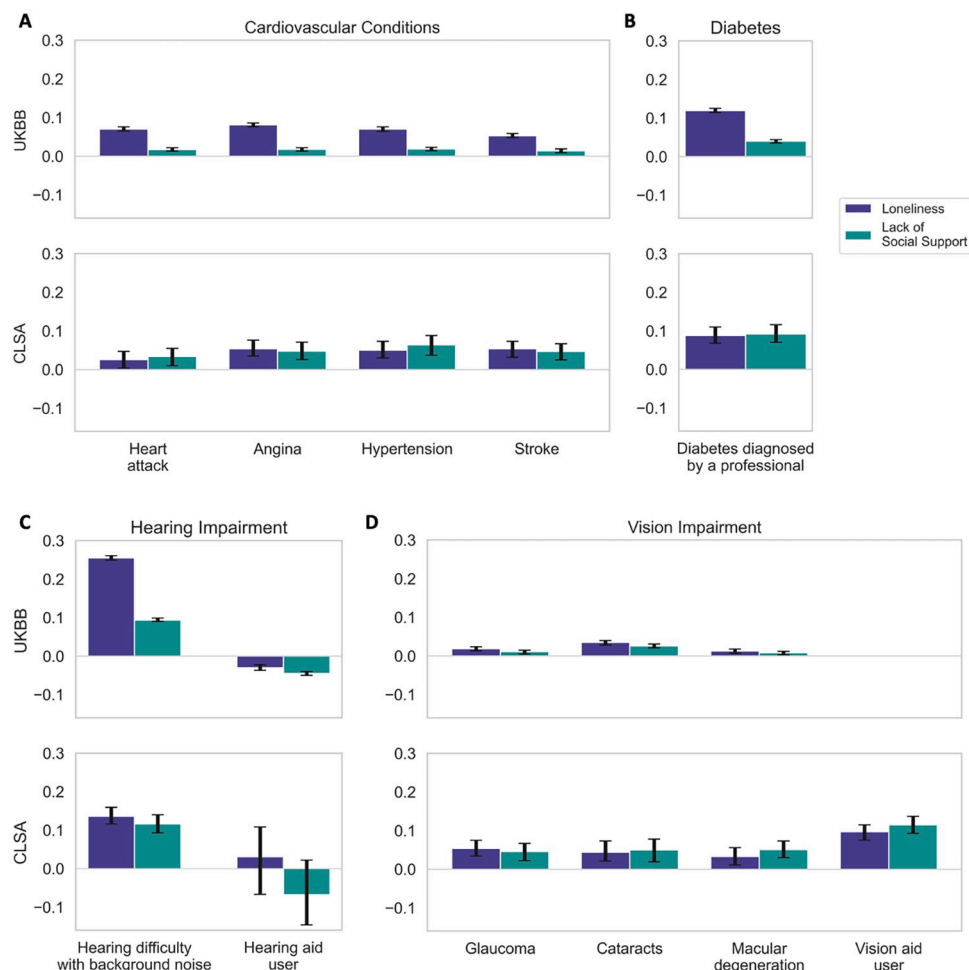

**Fig 3. Physical health factors are related to social isolation.** Bayesian estimation of the posterior probability that a given risk factor relates to one of two measures of social deprivation: loneliness and lack of social support. All physical health risk factor variables were standardized prior to running the Bayesian models. For simplicity, results are expressed as the mean and the 90% highest posterior density interval of the model coefficients (black error bars). In the UKBB and the CLSA cohorts, loneliness and poor social support show strong links with several physical health factors, such as (A) hypertension, (B) diabetes, (C) hearing difficulty with background noise, and (D) being a vision aid user. Across the two cohorts, hearing difficulty with background noise has the largest association with both subjective and objective social isolation in this pillar of risk traits.

<https://doi.org/10.1371/journal.pone.0280471.g003>

Among the examined measures of personal habits and lifestyle factors, sleep serves as a prototypical representative that showed several, and some of the largest, associations with social isolation, which successfully replicated across the UK Biobank and the CLSA cohorts. We found that all our measures of sleep disturbance had strong associations with loneliness and lack of social support across both cohorts. Similar to our findings, objective social isolation and self-reported loneliness have previously been linked to reduced sleep efficiency and poor sleep quality [41–44]. Other investigators have hypothesized that perceived social isolation relates to hypervigilance for social threats [20], which in turn increases anxiety and reduces sleep quality. Consistent with this idea, many reports have shown that feelings of loneliness and reduced social support occur especially in individuals who report higher stress levels [45–47]. Stress pile-up and emotional coping have been argued previously to contribute to the underlying reasons why lonely people are more often smokers [48], binge drinkers [49], and binge-watchers [50, 51]. Interpersonal buffering, such as provided by subjective and objective



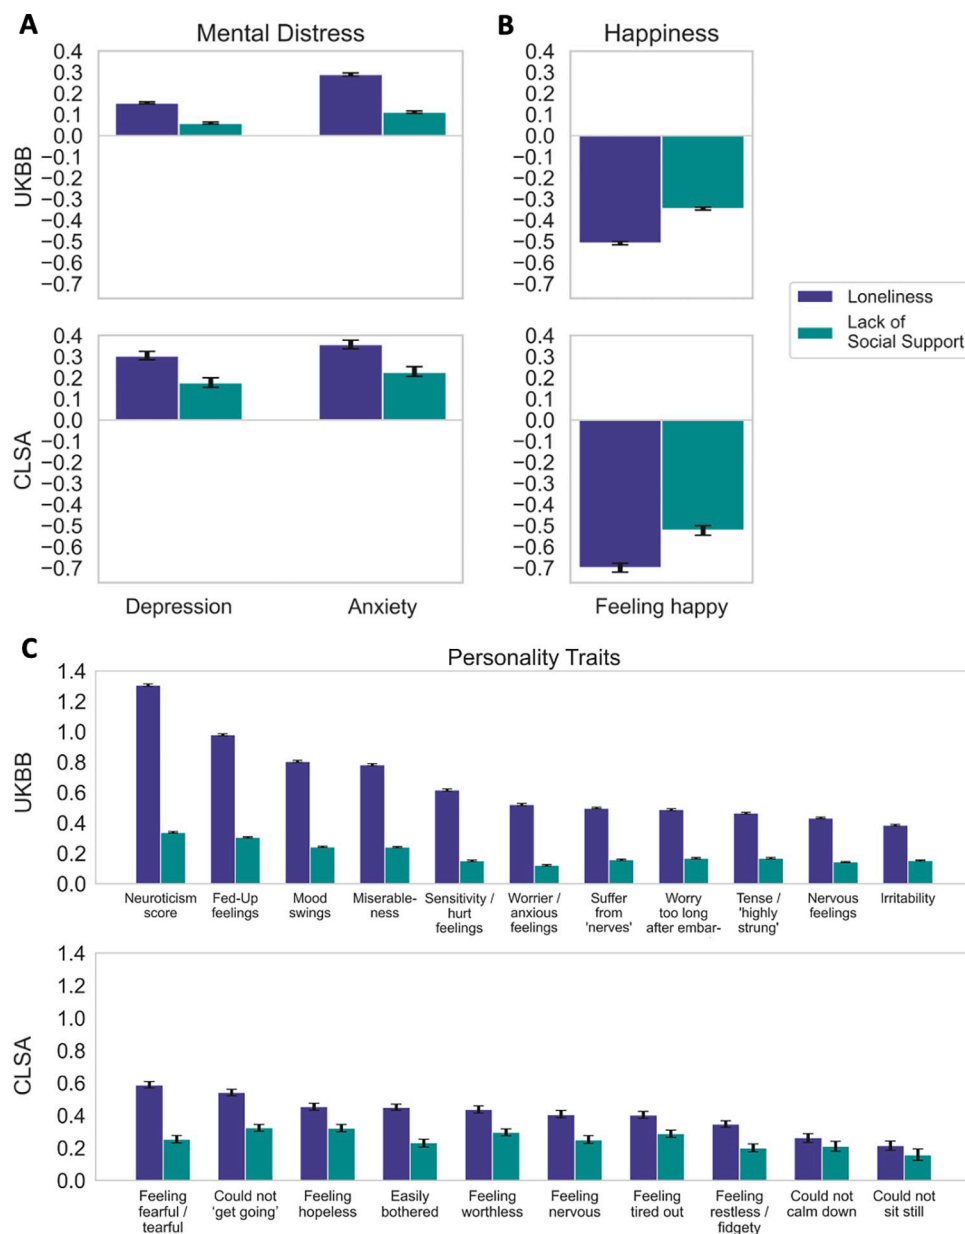

**Fig 4. Mental health factors show prominent association effects with social isolation.** Bayesian estimation of the posterior probability that a given risk factor relates to one of two measures of social deprivation: loneliness and lack of social support. All target risk factor variables were normalized by z-scoring across participants prior to running the Bayesian models. For simplicity, results are expressed as the mean and the 90% highest posterior density interval for the model coefficients (black error bars). In this category and across the two datasets, both loneliness and lack of social support show some of the most prominent links with (A) depression and anxiety, (B) feelings of happiness, and (C) several measures of personality that play into the stress-buffer capacity of an individual. In particular, the neuroticism score has the largest association with both subjective and objective social isolation among all the examined ADRD risk factors.

<https://doi.org/10.1371/journal.pone.0280471.g004>

social support, have been argued to be important psychosocial resources to cope with stressors [48, 52]. There is a growing body of evidence that sleep disturbance [53], smoking cigarettes [54, 55], excessive alcohol consumption [56], and excessive television viewing [57, 58] are all linked to cognitive decline and the development of ADRD. Our findings across two large

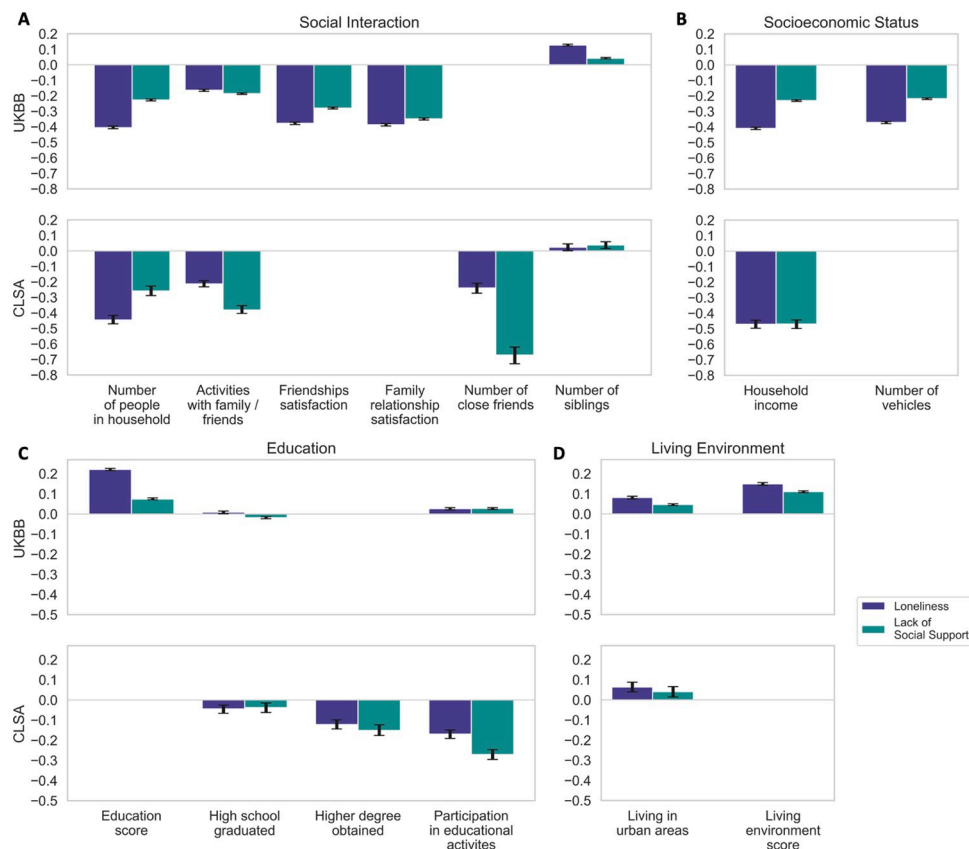

**Fig 5. Societal risk factors exhibit salient association effects with social isolation.** Bayesian estimation of the posterior probability that a given risk factor relates to one of two measures of social deprivation: loneliness and lack of social support. All societal risk factor variables were z-scored prior to running the Bayesian models. For simplicity, results are expressed as the mean and the 90% highest posterior density interval for the model coefficients (black error bars). In the UKBB and the CLSA datasets, loneliness and lack of social support show strong associations with several societal factors, including (A) the number of people living in the household and the number of close friends, (B) household income, and (C) graduating from high school and obtaining higher degrees. (D) Living in an urban environment is also linked with higher levels of subjective and objective social deprivation.

<https://doi.org/10.1371/journal.pone.0280471.g005>

cohorts showed that these potentially modifiable lifestyle factors that affect the onset of dementia have large associations with both loneliness and lack of social support.

Charting a series of physical health factors, notably cardiovascular conditions, diabetes, and physical exercise, we have shown all to feature some link to social isolation status, which corroborated across both cohorts. Our results are in line with existing research showing a detrimental effect of objective social isolation on subsequent dementia through cardiovascular pathways, by increasing the risk of hypertension [59] and coronary heart disease [60]. There is accumulating evidence that associates heart disease risk factors—diabetes, hypertension, obesity, smoking cigarettes—with late-life risk of cognitive impairment and dementia [61, 62]. Moreover, participation in physical activities has been associated with better vascular health and lower risks of high cholesterol and diabetes [63] and regular physical exercise has repeatedly been shown to significantly reduce the risk of developing of dementia. Aside from the cardiovascular benefits, we explicitly showed that the social aspect of physical exercise was also important in relation to loneliness and social support. Consistent with our results, one study found that aerobic physical activities done alone did not seem to have any cognitive benefits in 754 healthy older adults [64].

Among the considered mental health factors and all our examined measures in general, we found personality traits to feature the largest associations with social isolation, replicated across both cohorts. Our previous research has also shown a relation between personality traits and social isolation in genome-wide assessments in the UK Biobank [12]. The neuroticism score, which reflects a person's level of emotional volatility and vulnerability to stress, showed one the strongest effect size for loneliness and lack of social support, in the context of all the examined ADRD risk factors. Greater levels of late-life neuroticism have been previously associated with higher risk of developing mild cognitive impairment [65] and dementia [66–68]. Hostinar & Gunnar [69] showed that through a phenomenon termed the social buffering of stress, specific personality traits can affect an individual's susceptibility to the effects of stressors, while social support can dampen physiological stress responses [70].

By the same token, the well-established 'cognitive reserve' hypothesis claims that intellectual enrichment provides a cognitive buffer to deal with injuries to the nervous system [71], which is an overarching theme among the societal factors. In our rich datasets, we had the opportunity to concurrently examine the possible associations of numerous factors related to cognitive load, including education levels, socioeconomic status, computer use, sensory impairment, and different aspects of social interaction. Although, the relationship between social isolation and cognitive reserve is only now receiving increasing attention [72–74], we found consistently striking associations between these potentially modifiable societal factors and both loneliness and lack of social support, paralleled across two large cohorts, despite the slight difference in measures examined for the same construct between the two cohorts. Other investigators have suggested that interventions targeting social isolation and promoting a socially active lifestyle in later life may enhance cognitive reserve and reduce the risk of dementia [73].

Given the current conceptual framework of this paper, our discussion revolves around dementia more broadly rather than Alzheimer's disease in particular. In line with recent research on different biomarkers combinations in individual ADRD prognosis [75], our results also open the possibility for individual differences in the combinations of ADRD risk markers that are impacted by either or both subjective and objective social isolation. As our main contribution to the dementia literature, our study offers a comprehensive overview of the wide-ranging population-level associations between social deprivation and many ADRD risk factors.

## Conclusion

Our understanding about the implications of social isolation on ADRD remains in its infancy relative to the current evidence on other classical risk factors. However, our findings show a large array of associations between these potentially modifiable risk factors and both loneliness and lack of social support. Our collective findings underscore the importance of exploring subjective and objective social isolation in depth to inform policy interventions, especially among the elderly. Compared to other ADRD risk factors, such as ApoE4 genotype, social isolation is arguably easier to modify, and therefore, particularly promising to target and alter. As the persistence of the COVID-19 pandemic continues to force imposition of social distancing measures, research on these often-neglected aspects of everyday social interaction may pave the way to address the two global public health priorities, separately recognized by the World Health Organization: ADRD and social isolation.

## Supporting information

**S1 File.**  
(DOCX)

## Author Contributions

**Conceptualization:** Kimia Shafighi, Danilo Bzdok.

**Formal analysis:** Kimia Shafighi.

**Investigation:** Kimia Shafighi.

**Methodology:** Kimia Shafighi.

**Supervision:** Danilo Bzdok.

**Validation:** Danilo Bzdok.

**Visualization:** Kimia Shafighi.

**Writing – original draft:** Kimia Shafighi.

**Writing – review & editing:** Kimia Shafighi, Sylvia Villeneuve, Pedro Rosa Neto, AmanPreet Badhwar, Judes Poirier, Vaibhav Sharma, Yasser Iturria Medina, Patricia P. Silveira, Laurette Dube, David Glahn, Danilo Bzdok.

## References

1. Patterson C. World Alzheimer report 2018. 2018.
2. Livingston G, Sommerlad A, Orgeta V, Costafreda SG, Huntley J, Ames D, et al. Dementia prevention, intervention, and care. *The Lancet*. 2017; 390(10113):2673–734. [https://doi.org/10.1016/S0140-6736\(17\)31363-6](https://doi.org/10.1016/S0140-6736(17)31363-6) PMID: 28735855
3. Di Marco LY, Marzo A, Muñoz-Ruiz M, Ikram MA, Kivipelto M, Ruefenacht D, et al. Modifiable lifestyle factors in dementia: a systematic review of longitudinal observational cohort studies. *J Alzheimers Dis*. 2014; 42(1):119–35. <https://doi.org/10.3233/JAD-132225> PMID: 24799342
4. Marioni RE, Proust-Lima C, Amieva H, Brayne C, Matthews FE, Dartigues J-F, et al. Social activity, cognitive decline and dementia risk: a 20-year prospective cohort study. *BMC Public Health*. 2015; 15(1):1089.
5. Penninkilampi R, Casey AN, Singh MF, Brodaty H. The Association between Social Engagement, Loneliness, and Risk of Dementia: A Systematic Review and Meta-Analysis. *J Alzheimers Dis*. 2018; 66(4):1619–33. <https://doi.org/10.3233/JAD-180439> PMID: 30452410
6. Seidler A, Bernhardt T, Nienhaus A, Frölich L. Association between the psychosocial network and dementia—a case-control study. *J Psychiatr Res*. 2003; 37(2):89–98. [https://doi.org/10.1016/s0022-3956\(02\)00065-1](https://doi.org/10.1016/s0022-3956(02)00065-1) PMID: 12842162
7. Sundström A, Adolfsson AN, Nordin M, Adolfsson R. Loneliness Increases the Risk of All-Cause Dementia and Alzheimer's Disease. *The Journals of Gerontology: Series B*. 2020; 75(5):919–26. <https://doi.org/10.1093/geronb/gbz139> PMID: 31676909
8. Xiang X, Lai PHL, Bao L, Sun Y, Chen J, Dunkle RE, et al. Dual Trajectories of Social Isolation and Dementia in Older Adults: A Population-Based Longitudinal Study. *Journal of Aging and Health*. 2020; 33(1–2):63–74. <https://doi.org/10.1177/0898264320953693> PMID: 32865104
9. WHO. Dementia: a public health priority. Geneva: World Health Organization; 2012.
10. European Observatory on Health Systems and Policies, Marczak J, Wittenberg R, Doetter LF, Casanova G, Golinowska S, et al. Preventing social isolation and loneliness among older people. *Eurohealth*. 2019; 25(4):3–5.
11. Livingston G, Huntley J, Sommerlad A, Ames D, Ballard C, Banerjee S, et al. Dementia prevention, intervention, and care: 2020 report of the Lancet Commission. *The Lancet*. 2020; 396(10248):413–46. [https://doi.org/10.1016/S0140-6736\(20\)30367-6](https://doi.org/10.1016/S0140-6736(20)30367-6) PMID: 32738937
12. Bzdok D, Dunbar RIM. The Neurobiology of Social Distance. *Trends in Cognitive Sciences*. 2020; 24(9):717–33. <https://doi.org/10.1016/j.tics.2020.05.016> PMID: 32561254
13. Donovan NJ, Okereke OI, Vannini P, Amariglio RE, Rentz DM, Marshall GA, et al. Association of Higher Cortical Amyloid Burden With Loneliness in Cognitively Normal Older Adults. *JAMA Psychiatry*. 2016; 73(12):1230–7. <https://doi.org/10.1001/jamapsychiatry.2016.2657> PMID: 27806159
14. Shankar A, McMunn A, Demakakos P, Hamer M, Steptoe A. Social isolation and loneliness: Prospective associations with functional status in older adults. *Health Psychol*. 2017; 36(2):179–87. <https://doi.org/10.1037/hea0000437> PMID: 27786518

15. Boss L, Kang DH, Branson S. Loneliness and cognitive function in the older adult: a systematic review. *Int Psychogeriatr*. 2015; 27(4):541–53. <https://doi.org/10.1017/S1041610214002749> PMID: 25554219
16. Biddle KD, d'Oleire Uquillas F, Jacobs HIL, Zide B, Kirn DR, Rentz DM, et al. Social Engagement and Amyloid- $\beta$ -Related Cognitive Decline in Cognitively Normal Older Adults. *Am J Geriatr Psychiatry*. 2019; 27(11):1247–56.
17. Holwerda TJ, Deeg DJH, Beekman ATF, van Tilburg TG, Stek ML, Jonker C, et al. Feelings of loneliness, but not social isolation, predict dementia onset: results from the Amsterdam Study of the Elderly (AMSTEL). *Journal of Neurology, Neurosurgery & Psychiatry*. 2014; 85(2):135.
18. d'Oleire Uquillas F, Jacobs HIL, Biddle KD, Properzi M, Hanseeuw B, Schultz AP, et al. Regional tau pathology and loneliness in cognitively normal older adults. *Transl Psychiatry*. 2018; 8(1):282. <https://doi.org/10.1038/s41398-018-0345-x> PMID: 30563962
19. Brown EG, Gallagher S, Creaven AM. Loneliness and acute stress reactivity: A systematic review of psychophysiological studies. *Psychophysiology*. 2018; 55(5):e13031. <https://doi.org/10.1111/psyp.13031> PMID: 29152761
20. Cacioppo JT, Hawkley LC, Norman GJ, Berntson GG. Social isolation. *Ann N Y Acad Sci*. 2011; 1231(1):17–22. <https://doi.org/10.1111/j.1749-6632.2011.06028.x> PMID: 21651565
21. Griffin SC, Mezuk B, Williams AB, Perrin PB, Rybarczyk BD. Isolation, Not Loneliness or Cynical Hostility, Predicts Cognitive Decline in Older Americans. *Journal of Aging and Health*. 2018; 32(1–2):52–60. <https://doi.org/10.1177/0898264318800587> PMID: 30289338
22. Lara E, Caballero FF, Rico-Urbe LA, Olaya B, Haro JM, Ayuso-Mateos JL, et al. Are loneliness and social isolation associated with cognitive decline? *International Journal of Geriatric Psychiatry*. 2019; 34(11):1613–22. <https://doi.org/10.1002/gps.5174> PMID: 31304639
23. Holt-Lunstad J, Smith TB, Baker M, Harris T, Stephenson D. Loneliness and social isolation as risk factors for mortality: a meta-analytic review. *Perspect Psychol Sci*. 2015; 10(2):227–37. <https://doi.org/10.1177/1745691614568352> PMID: 25910392
24. Bycroft C, Freeman C, Petkova D, Band G, Elliott LT, Sharp K, et al. The UK Biobank resource with deep phenotyping and genomic data. *Nature*. 2018; 562(7726):203–9. <https://doi.org/10.1038/s41586-018-0579-z> PMID: 30305743
25. Raina PS, Wolfson C, Kirkland SA, Griffith LE, Oremus M, Patterson C, et al. The Canadian longitudinal study on aging (CLSA). *Can J Aging*. 2009; 28(3):221–9. <https://doi.org/10.1017/S0714980809990055> PMID: 19860977
26. Bzdok D, Yeo BTT. Inference in the age of big data: Future perspectives on neuroscience. *Neuroimage*. 2017; 155:549–64. <https://doi.org/10.1016/j.neuroimage.2017.04.061> PMID: 28456584
27. Smith SM, Nichols TE. Statistical Challenges in "Big Data" Human Neuroimaging. *Neuron*. 2018; 97(2):263–8. <https://doi.org/10.1016/j.neuron.2017.12.018> PMID: 29346749
28. Sudlow C, Gallacher J, Allen N, Beral V, Burton P, Danesh J, et al. UK biobank: an open access resource for identifying the causes of a wide range of complex diseases of middle and old age. *PLoS Med*. 2015; 12(3):e1001779. <https://doi.org/10.1371/journal.pmed.1001779> PMID: 25826379
29. Raina P, Wolfson C, Kirkland S, Griffith LE, Balion C, Cossette B, et al. Cohort Profile: The Canadian Longitudinal Study on Aging (CLSA). *International Journal of Epidemiology*. 2019; 48(6):1752–3j.
30. Ong AD, Uchino BN, Wethington E. Loneliness and Health in Older Adults: A Mini-Review and Synthesis. *Gerontology*. 2016; 62(4):443–9. <https://doi.org/10.1159/000441651> PMID: 26539997
31. Spreng RN, Dimas E, Mwilambwe-Tshilobo L, Dagher A, Koellinger P, Nave G, et al. The default network of the human brain is associated with perceived social isolation. *Nature Communications*. 2020; 11(1):6393. <https://doi.org/10.1038/s41467-020-20039-w> PMID: 33319780
32. Gelman A, Carlin JB, Stern HS, Dunson DB, Vehtari A, Rubin DB. *Bayesian Data Analysis*. 3rd ed 2014.
33. Bzdok D, Floris DL, Marquand AF. Analysing brain networks in population neuroscience: a case for the Bayesian philosophy. *Philosophical Transactions of the Royal Society B: Biological Sciences*. 2020; 375(1796):20190661. <https://doi.org/10.1098/rstb.2019.0661> PMID: 32089111
34. Kiesow H, Dunbar RIM, Kable JW, Kalenscher T, Vogeley K, Schilbach L, et al. 10,000 social brains: Sex differentiation in human brain anatomy. *Science Advances*. 2020; 6(12):eaaz1170. <https://doi.org/10.1126/sciadv.aaz1170> PMID: 32206722
35. Marquand AF, Rezek I, Buitelaar J, Beckmann CF. Understanding Heterogeneity in Clinical Cohorts Using Normative Models: Beyond Case-Control Studies. *Biol Psychiatry*. 2016; 80(7):552–61. <https://doi.org/10.1016/j.biopsych.2015.12.023> PMID: 26927419
36. Kruschke JK. *Doing Bayesian Data Analysis*. 2nd ed 2014.
37. Salvatier John, Thomas V. Wiecki, Fonnesbeck C. Probabilistic programming in Python using PyMC3. *PeerJ Computer Science*. 2016.



38. Roderick J. A Little DR. Statistical Analysis with Missing Data: John Wiley & Sons; 2019.
39. Andrew Gelman JBC, Hal S. Stern, David B. Dunson, Aki Vehtari, Donald B. Rubin. Bayesian Data Analysis: Chapman and Hall; 2013.
40. Wang H-T, Smallwood J, Mourao-Miranda J, Xia CH, Satterthwaite TD, Bassett DS, et al. Finding the needle in a high-dimensional haystack: Canonical correlation analysis for neuroscientists. *NeuroImage*. 2020; 216:116745. <https://doi.org/10.1016/j.neuroimage.2020.116745> PMID: 32278095
41. Cacioppo JT, Hawkley LC, Berntson GG, Ernst JM, Gibbs AC, Stickgold R, et al. Do lonely days invade the nights? Potential social modulation of sleep efficiency. *Psychol Sci*. 2002; 13(4):384–7. <https://doi.org/10.1111/1467-9280.00469> PMID: 12137144
42. Griffin SC, Williams AB, Ravyts SG, Mladen SN, Rybarczyk BD. Loneliness and sleep: A systematic review and meta-analysis. *Health Psychol Open*. 2020; 7(1):2055102920913235-. <https://doi.org/10.1177/2055102920913235> PMID: 32284871
43. Smith SS, Kozak N, Sullivan KA. An investigation of the relationship between subjective sleep quality, loneliness and mood in an Australian sample: can daily routine explain the links? *Int J Soc Psychiatry*. 2012; 58(2):166–71. <https://doi.org/10.1177/0020764010387551> PMID: 21106604
44. Yu B, Steptoe A, Niu K, Ku PW, Chen LJ. Prospective associations of social isolation and loneliness with poor sleep quality in older adults. *Qual Life Res*. 2018; 27(3):683–91. <https://doi.org/10.1007/s11136-017-1752-9> PMID: 29188485
45. Cacioppo JT, Hawkley LC, Ernst JM, Burleson M, Berntson GG, Nouriani B, et al. Loneliness within a nomological net: An evolutionary perspective. *Journal of Research in Personality*. 2006; 40(6):1054–85.
46. Campagne DM. Stress and perceived social isolation (loneliness). *Arch Gerontol Geriatr*. 2019; 82:192–9. <https://doi.org/10.1016/j.archger.2019.02.007> PMID: 30825769
47. Viswesvaran C, Sanchez JI, Fisher J. The Role of Social Support in the Process of Work Stress: A Meta-Analysis. *Journal of Vocational Behavior*. 1999; 54(2):314–34.
48. Slopen N, Kontos EZ, Ryff CD, Ayanian JZ, Albert MA, Williams DR. Psychosocial stress and cigarette smoking persistence, cessation, and relapse over 9–10 years: a prospective study of middle-aged adults in the United States. *Cancer Causes Control*. 2013; 24(10):1849–63. <https://doi.org/10.1007/s10552-013-0262-5> PMID: 23860953
49. Grzywacz JG, Almeida DM. Stress and Binge Drinking: A Daily Process Examination of Stressor Pile-up and Socioeconomic Status in Affect Regulation. *Int J Stress Manag*. 2008; 15(4):364–80. <https://doi.org/10.1037/a0013368> PMID: 19578556
50. Starosta J, Izydorczyk B, Lizińczyk S. Characteristics of people's binge-watching behavior in the "entering into early adulthood" period of life. *Health Psychology Report*. 2019; 7(2):149–64.
51. Starosta JA, Izydorczyk B. Understanding the Phenomenon of Binge-Watching-A Systematic Review. *Int J Environ Res Public Health*. 2020; 17(12):4469. <https://doi.org/10.3390/ijerph17124469> PMID: 32580289
52. Schneiderman N, Ironson G, Siegel SD. Stress and health: psychological, behavioral, and biological determinants. *Annu Rev Clin Psychol*. 2005; 1:607–28. <https://doi.org/10.1146/annurev.clinpsy.1.102803.144141> PMID: 17716101
53. Sterniczuk R, Theou O, Rusak B, Rockwood K. Sleep disturbance is associated with incident dementia and mortality. *Curr Alzheimer Res*. 2013; 10(7):767–75. <https://doi.org/10.2174/15672050113109990134> PMID: 23905991
54. Anstey KJ, von Sanden C, Salim A, O'Kearney R. Smoking as a risk factor for dementia and cognitive decline: a meta-analysis of prospective studies. *Am J Epidemiol*. 2007; 166(4):367–78. <https://doi.org/10.1093/aje/kwm116> PMID: 17573335
55. Peters R, Poulter R, Warner J, Beckett N, Burch L, Bulpitt C. Smoking, dementia and cognitive decline in the elderly, a systematic review. *BMC Geriatr*. 2008; 8:36. <https://doi.org/10.1186/1471-2318-8-36> PMID: 19105840
56. Xu W, Wang H, Wan Y, Tan C, Li J, Tan L, et al. Alcohol consumption and dementia risk: a dose-response meta-analysis of prospective studies. *Eur J Epidemiol*. 2017; 32(1):31–42. <https://doi.org/10.1007/s10654-017-0225-3> PMID: 28097521
57. Fancourt D, Steptoe A. Television viewing and cognitive decline in older age: findings from the English Longitudinal Study of Ageing. *Scientific Reports*. 2019; 9(1):2851. <https://doi.org/10.1038/s41598-019-39354-4> PMID: 30820029
58. Lindstrom HA, Fritsch T, Petot G, Smyth KA, Chen CH, Debanne SM, et al. The relationships between television viewing in midlife and the development of Alzheimer's disease in a case-control study. *Brain Cogn*. 2005; 58(2):157–65. <https://doi.org/10.1016/j.bandc.2004.09.020> PMID: 15919546

59. Yang YC, Boen C, Gerken K, Li T, Schorpp K, Harris KM. Social relationships and physiological determinants of longevity across the human life span. *Proc Natl Acad Sci U S A*. 2016; 113(3):578–83. <https://doi.org/10.1073/pnas.1511085112> PMID: 26729882
60. Hemingway H, Marmot M. Evidence based cardiology: psychosocial factors in the aetiology and prognosis of coronary heart disease. Systematic review of prospective cohort studies. *BMJ*. 1999; 318(7196):1460–7. <https://doi.org/10.1136/bmj.318.7196.1460> PMID: 10346775
61. Gottesman RF, Albert MS, Alonso A, Coker LH, Coresh J, Davis SM, et al. Associations Between Mid-life Vascular Risk Factors and 25-Year Incident Dementia in the Atherosclerosis Risk in Communities (ARIC) Cohort. *JAMA Neurol*. 2017; 74(10):1246–54. <https://doi.org/10.1001/jamaneurol.2017.1658> PMID: 28783817
62. Justin BN, Turek M, Hakim AM. Heart disease as a risk factor for dementia. *Clin Epidemiol*. 2013; 5:135–45. <https://doi.org/10.2147/CLEP.S30621> PMID: 23658499
63. Warburton DER, Nicol CW, Bredin SSD. Health benefits of physical activity: the evidence. *CMAJ*. 2006; 174(6):801–9. <https://doi.org/10.1503/cmaj.051351> PMID: 16534088
64. Young J, Angevaren M, Rusted J, Tabet N. Aerobic exercise to improve cognitive function in older people without known cognitive impairment. *Cochrane Database Syst Rev*. 2015(4):Cd005381. <https://doi.org/10.1002/14651858.CD005381.pub4> PMID: 25900537
65. Wilson RS, Schneider JA, Boyle PA, Arnold SE, Tang Y, Bennett DA. Chronic distress and incidence of mild cognitive impairment. *Neurology*. 2007; 68(24):2085–92. <https://doi.org/10.1212/01.wnl.0000264930.97061.82> PMID: 17562829
66. Wilson RS, Arnold SE, Schneider JA, Kelly JF, Tang Y, Bennett DA. Chronic psychological distress and risk of Alzheimer's disease in old age. *Neuroepidemiology*. 2006; 27(3):143–53. <https://doi.org/10.1159/000095761> PMID: 16974109
67. Wilson RS, Barnes LL, Bennett DA, Li Y, Bienias JL, Mendes de Leon CF, et al. Proneness to psychological distress and risk of Alzheimer disease in a biracial community. *Neurology*. 2005; 64(2):380–2. <https://doi.org/10.1212/01.WNL.0000149525.53525.E7> PMID: 15668449
68. Wilson RS, Evans DA, Bienias JL, Mendes de Leon CF, Schneider JA, Bennett DA. Proneness to psychological distress is associated with risk of Alzheimer's disease. *Neurology*. 2003; 61(11):1479–85. <https://doi.org/10.1212/01.wnl.0000096167.56734.59> PMID: 14663028
69. Lecic-Tosevski D, Vukovic O, Stepanovic J. Stress and personality. *Psychiatriki*. 2011; 22(4):290–7. PMID: 22271841
70. Hostinar CE, Gunnar MR. Social Support Can Buffer against Stress and Shape Brain Activity. *AJOB Neurosci*. 2015; 6(3):34–42. <https://doi.org/10.1080/21507740.2015.1047054> PMID: 26478822
71. Stern Y. What is cognitive reserve? Theory and research application of the reserve concept. *J Int Neuropsychol Soc*. 2002; 8(3):448–60. PMID: 11939702
72. Bennett DA, Schneider JA, Tang Y, Arnold SE, Wilson RS. The effect of social networks on the relation between Alzheimer's disease pathology and level of cognitive function in old people: a longitudinal cohort study. *The Lancet Neurology*. 2006; 5(5):406–12. [https://doi.org/10.1016/S1474-4422\(06\)70417-3](https://doi.org/10.1016/S1474-4422(06)70417-3) PMID: 16632311
73. Evans IEM, Llewellyn DJ, Matthews FE, Woods RT, Brayne C, Clare L. Social isolation, cognitive reserve, and cognition in healthy older people. *PLoS One*. 2018; 13(8):e0201008. <https://doi.org/10.1371/journal.pone.0201008> PMID: 30118489
74. Evans IEM, Llewellyn DJ, Matthews FE, Woods RT, Brayne C, Clare L. Social isolation, cognitive reserve, and cognition in older people with depression and anxiety. *Aging Ment Health*. 2019; 23(12):1691–700. <https://doi.org/10.1080/13607863.2018.1506742> PMID: 30518250
75. Cullen NC, Leuzy A, Palmqvist S, Janelidze S, Stomrud E, Pesini P, et al. Individualized prognosis of cognitive decline and dementia in mild cognitive impairment based on plasma biomarker combinations. *Nature Aging*. 2021; 1(1):114–23.
